# Supplementary material for: Disparities in Survival Outcomes among Racial/Ethnic Minorities with Head and Neck Squamous Cell Cancer in the United States
Source: MDPI journal article supplement (doi:10.3390/cancers15061781), 2023-03-15

Supplemental Table S1: Propensity Score Matching Analysis with Pair-wise Comparisons of Race

|                         | N      | HR               | p-value |
|-------------------------|--------|------------------|---------|
| Asian vs White<br>(Ref) | 10,506 | 0.87 (0.82 0.92) | <0.0001 |
| Asian vs Black<br>(Ref) | 10,506 | 0.73 (0.69 0.77) | <0.0001 |
| Black vs White<br>(Ref) | 29,724 | 1.13 (1.09 1.16) | <0.0001 |

Supplemental Figure S1. Overall Survival for Oropharyngeal HNSCC patients by Race and Human Papilloma-Virus (HPV status). (A) HPV positive; (B) HPV negative

(A) HPV-Positive

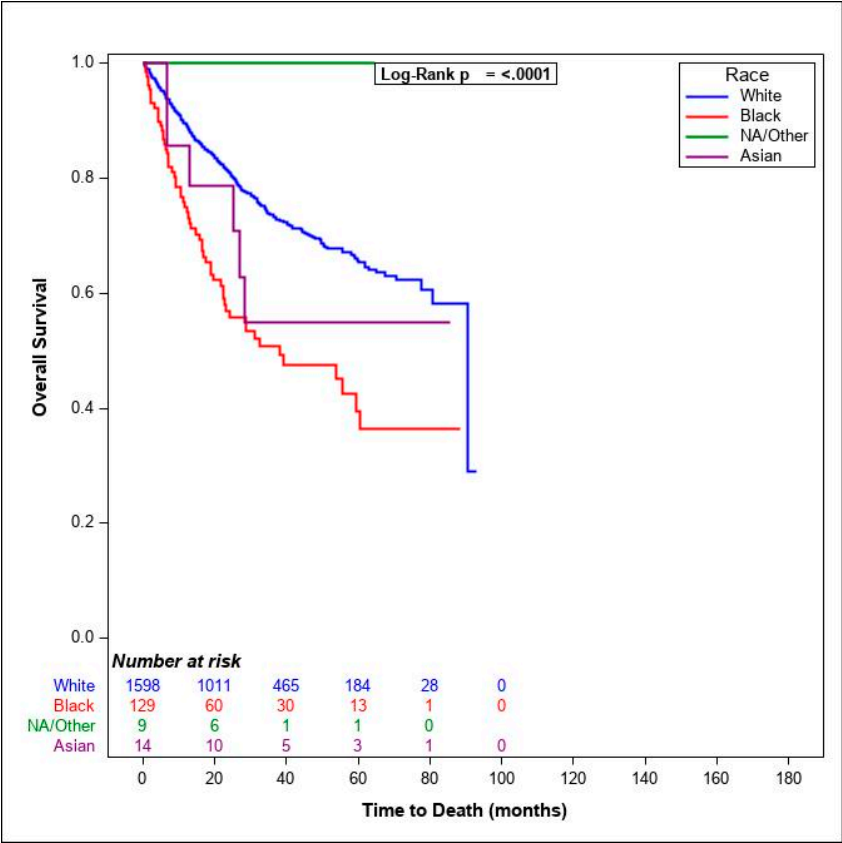

(B) HPV-Negative

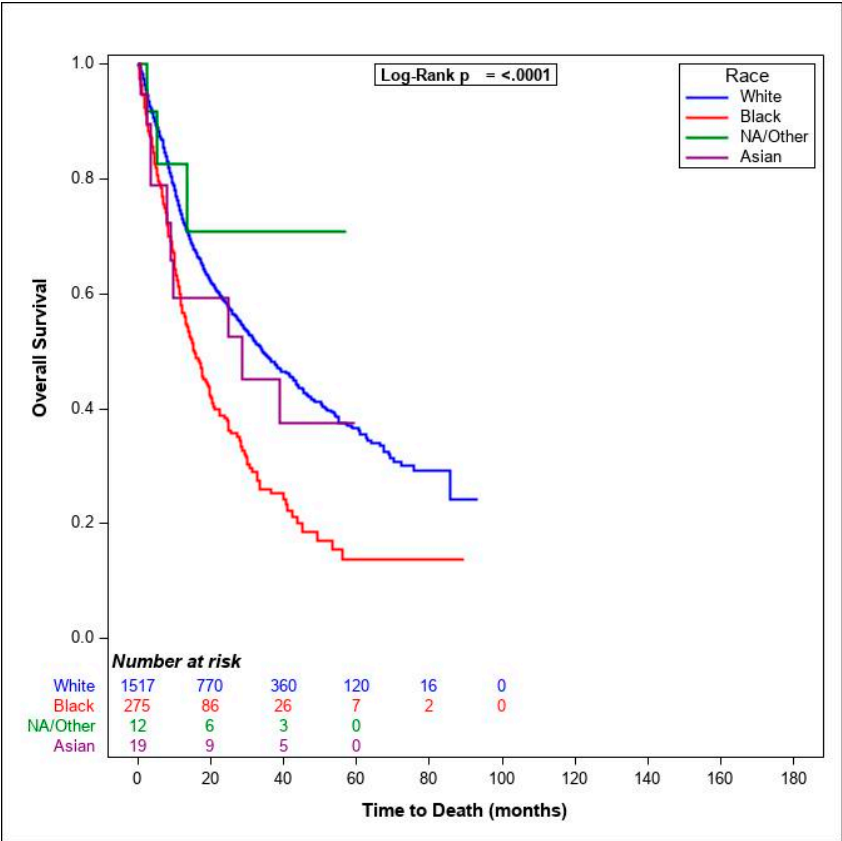

Supplemental Figure S2. Overall Survival for Black Head and Neck Cancer patients by (A) Income; (B) Insurance Status; (C) Receipt of Surgery

(A) Income

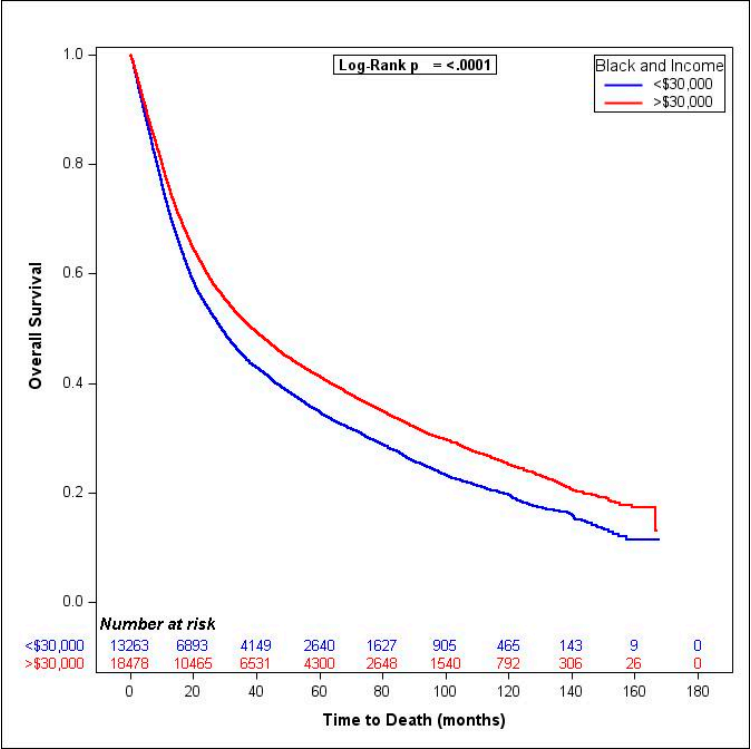

(B) Insurance Status

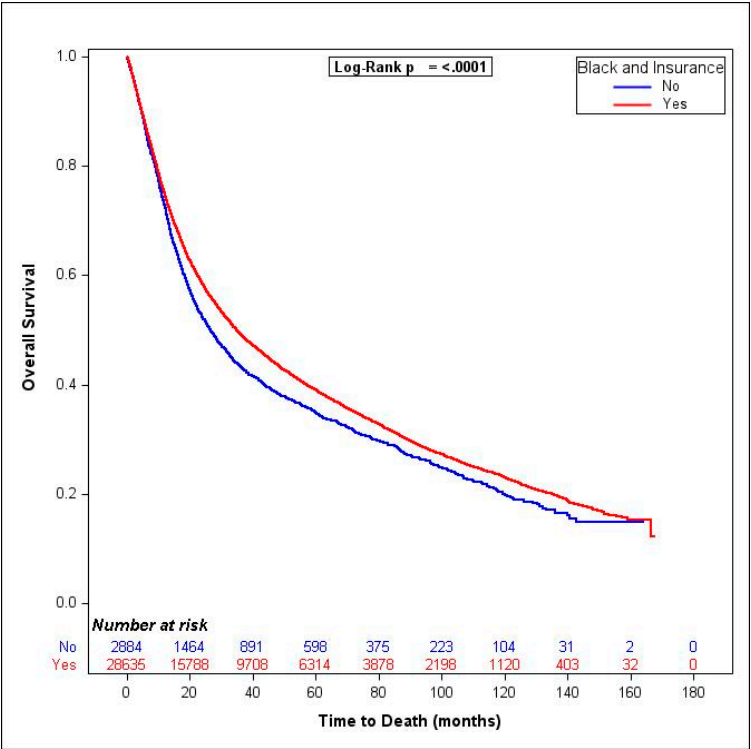

(C) Surgical Status

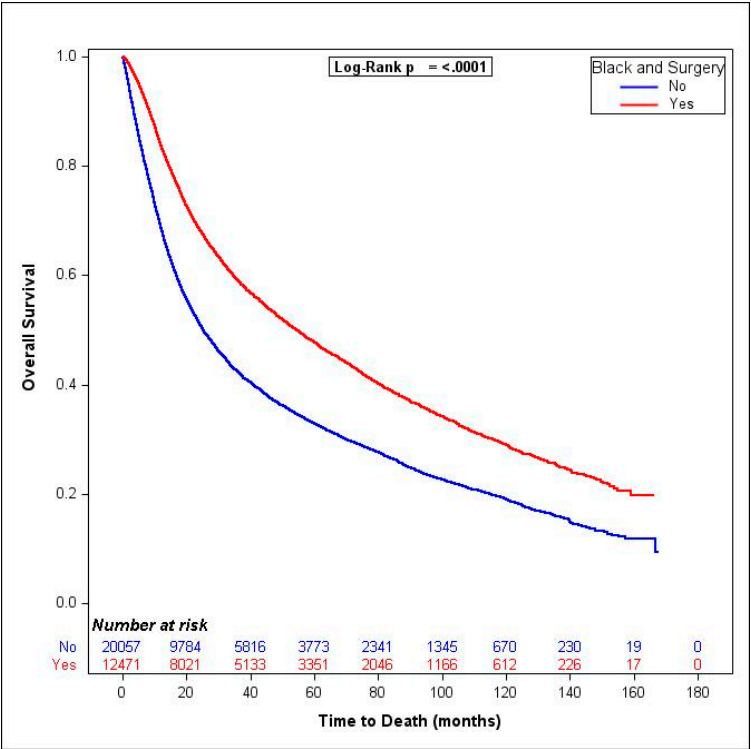

Supplement: s1 [file s1]
